# Supplementary material for: Structures, luminescent and magnetic properties of six lanthanide–organic frameworks: observation of slow magnetic relaxation behavior in the DyIII compound
Source: Royal Society of Chemistry journal article supplement (doi:10.1039/c2dt32390g), 2012-11-27
Supplement: c2dt32390g.pdf [file c2dt32390g.pdf]

Supporting Information for

**Structures, Luminescent and Magnetic Properties of Six Lanthanide-Organic Frameworks: Observation of Slow Magnetic Relaxation Behavior in the Dy<sup>III</sup> Compound**

Yin-Ling Hou,<sup>1,2</sup> Gang Xiong,<sup>1,2</sup> Bo Shen,<sup>2</sup> Bin Zhao,<sup>2,\*</sup> Zhi Chen,<sup>2</sup> Jian-Zhong Cui<sup>1,\*</sup>

<sup>1</sup> Department of Chemistry, Key Laboratory of Advanced Energy Material Chemistry, MOE, and TKL of Metal and Molecule Based Material Chemistry, Nankai University, Tianjin 300071, China.

<sup>2</sup> Department of Chemistry, Tianjin University, Tianjin, 300072, China.

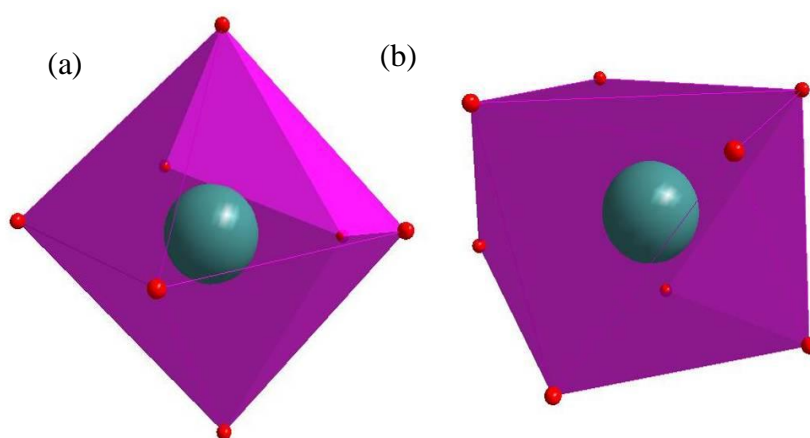

**Fig. S1** (a) The distorted pentagonal-bipyramidal coordination polyhedron of the Tb1, and (b) the distorted square antiprism coordination polyhedron of the Tb2.

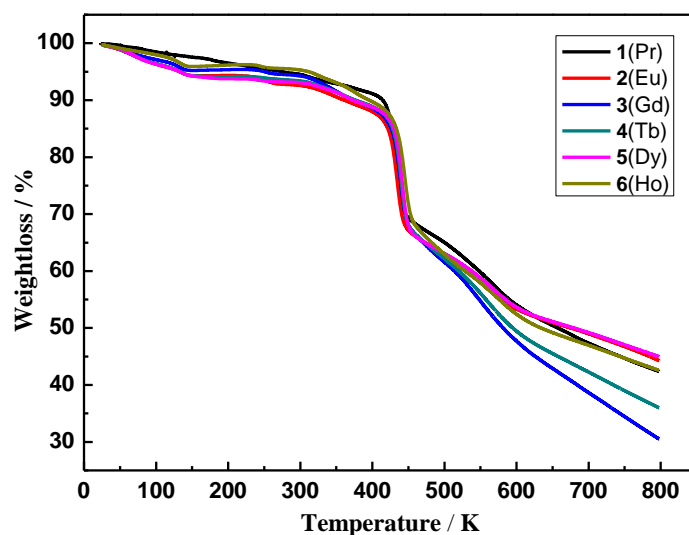

**Fig. S2** Thermogravimetric analyses (TGA) curves of 1–6.

<sup>1</sup> Department of Chemistry, Tianjin University, Tianjin, 300072, China. E-mail: cuijianzhong@tju.edu.cn

<sup>2</sup> Department of Chemistry, Nankai University, Tianjin 300071, China. E-mail: zhaobin@nankai.edu.cn

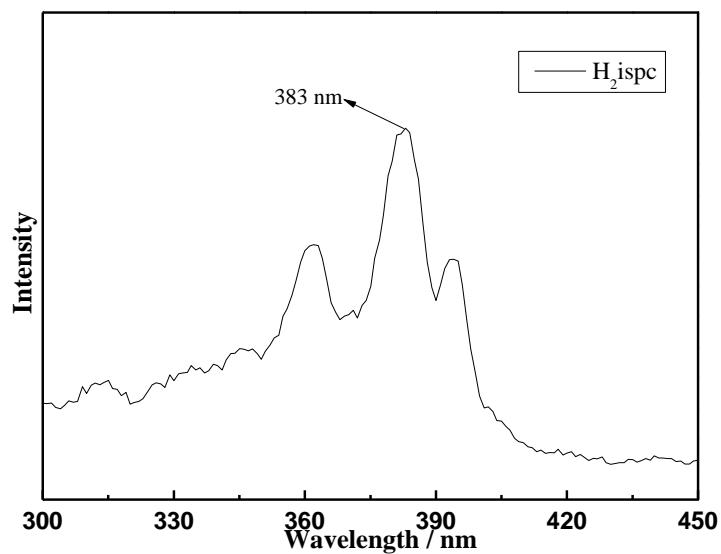

Fig. S3 The emission spectrum of the ligand H<sub>2</sub>ispc.

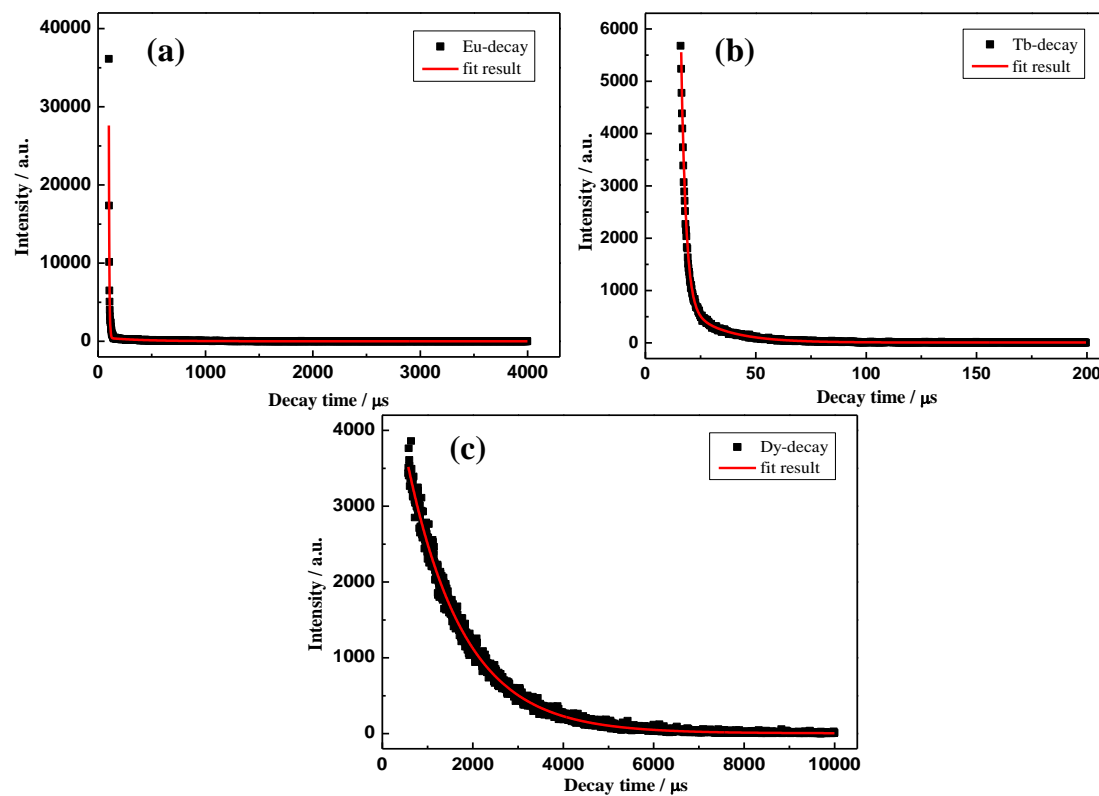

Fig. S4 Luminescence decay curves of compounds **2** (a), **4** (b), and **5** (c).

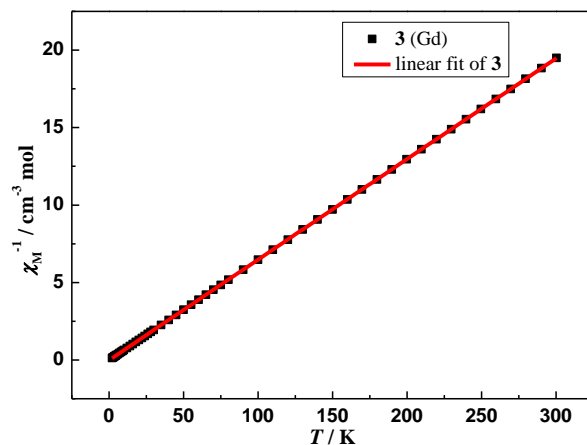

**Fig. S5** The  $\chi_M^{-1}$  versus  $T$  and the Curie-Weiss linear fit of **3**.

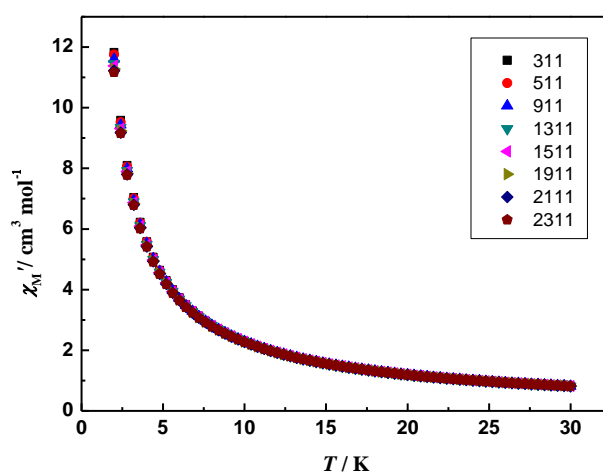

**Fig. S6** Temperature dependence of the in-phase ( $\chi'$ ) ac susceptibilities for **5** at the indicated frequencies and in zero dc field.

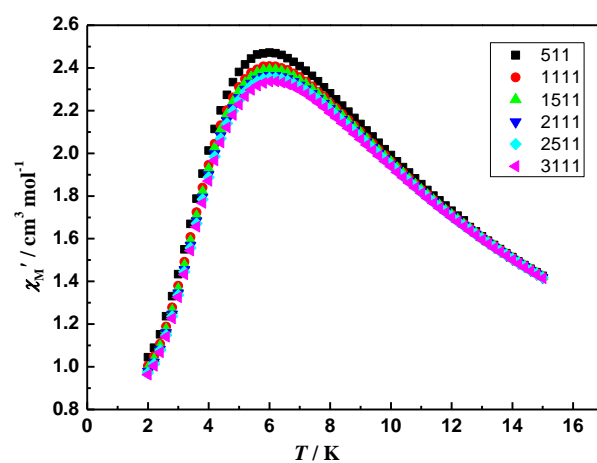

**Fig. S7** Temperature dependence of the in-phase ( $\chi'$ ) ac susceptibilities for **5** at the indicated frequencies in  $H_{dc} = 5000$  Oe.

**Table S1 Crystallographic Data for Compounds 1-6 for Normal Methods.**

| compound                                                                                                 | <b>1 (Pr)</b>                                                                                  | <b>2 (Eu)</b>                                                                                  | <b>3 (Gd)</b>                                                                                  | <b>4 (Tb)</b>                                                                                  | <b>5 (Dy)</b>                                                                                  | <b>6 (Ho)</b>                                                                                  |
|----------------------------------------------------------------------------------------------------------|------------------------------------------------------------------------------------------------|------------------------------------------------------------------------------------------------|------------------------------------------------------------------------------------------------|------------------------------------------------------------------------------------------------|------------------------------------------------------------------------------------------------|------------------------------------------------------------------------------------------------|
| formula                                                                                                  | C <sub>45</sub> H <sub>36</sub> O <sub>27</sub> <sup>-</sup><br>S <sub>3</sub> Pr <sub>2</sub> | C <sub>45</sub> H <sub>36</sub> O <sub>27</sub> <sup>-</sup><br>S <sub>3</sub> Eu <sub>2</sub> | C <sub>45</sub> H <sub>36</sub> O <sub>27</sub> <sup>-</sup><br>S <sub>3</sub> Gd <sub>2</sub> | C <sub>45</sub> H <sub>36</sub> O <sub>27</sub> <sup>-</sup><br>S <sub>3</sub> Tb <sub>2</sub> | C <sub>45</sub> H <sub>36</sub> O <sub>27</sub> <sup>-</sup><br>S <sub>3</sub> Dy <sub>2</sub> | C <sub>45</sub> H <sub>36</sub> O <sub>27</sub> <sup>-</sup><br>S <sub>3</sub> Ho <sub>2</sub> |
| fw                                                                                                       | 1386.74                                                                                        | 1408.84                                                                                        | 1419.42                                                                                        | 1422.76                                                                                        | 1429.92                                                                                        | 1434.78                                                                                        |
| <i>T</i> (K)                                                                                             | 150(2)                                                                                         | 150(2)                                                                                         | 150(2)                                                                                         | 150(2)                                                                                         | 150(2)                                                                                         | 150(2)                                                                                         |
| crystal system                                                                                           | triclinic                                                                                      | triclinic                                                                                      | triclinic                                                                                      | triclinic                                                                                      | triclinic                                                                                      | triclinic                                                                                      |
| space group                                                                                              | <i>P</i> -1                                                                                    |
| <i>Z</i>                                                                                                 | 2                                                                                              | 2                                                                                              | 2                                                                                              | 2                                                                                              | 2                                                                                              | 2                                                                                              |
| <i>a</i> (Å)                                                                                             | 9.3379(6)                                                                                      | 9.2706(3)                                                                                      | 9.2654(3)                                                                                      | 9.2574(19)                                                                                     | 9.1999(6)                                                                                      | 9.1671(18)                                                                                     |
| <i>b</i> (Å)                                                                                             | 15.7099(14)                                                                                    | 15.6634(7)                                                                                     | 15.6423(7)                                                                                     | 15.601(3)                                                                                      | 15.578(3)                                                                                      | 15.520(3)                                                                                      |
| <i>c</i> (Å)                                                                                             | 22.4311(12)                                                                                    | 22.3100(8)                                                                                     | 22.2867(10)                                                                                    | 22.274(4)                                                                                      | 22.142(5)                                                                                      | 22.199(4)                                                                                      |
| $\alpha$ (°)                                                                                             | 102.474(6)                                                                                     | 102.250(3)                                                                                     | 102.154(4)                                                                                     | 102.19(3)                                                                                      | 102.856(17)                                                                                    | 102.89(3)                                                                                      |
| $\beta$ (°)                                                                                              | 101.713(5)                                                                                     | 101.468(3)                                                                                     | 101.481(3)                                                                                     | 101.58(3)                                                                                      | 101.552(12)                                                                                    | 101.79(3)                                                                                      |
| $\gamma$ (°)                                                                                             | 104.905(7)                                                                                     | 104.507(3)                                                                                     | 104.445(3)                                                                                     | 104.32(3)                                                                                      | 104.517(12)                                                                                    | 104.14(3)                                                                                      |
| <i>V</i> (Å <sup>3</sup> )                                                                               | 2986.0(4)                                                                                      | 2954.21(19)                                                                                    | 2947.9(2)                                                                                      | 2936.0(10)                                                                                     | 2882.7(9)                                                                                      | 2871.3(10)                                                                                     |
| <i>D</i> <sub>calcd</sub><br>(g·cm <sup>-3</sup> )                                                       | 1.542                                                                                          | 1.584                                                                                          | 1.599                                                                                          | 1.609                                                                                          | 1.647                                                                                          | 1.660                                                                                          |
| $\mu$ (mm <sup>-1</sup> )                                                                                | 1.796                                                                                          | 2.289                                                                                          | 2.416                                                                                          | 2.576                                                                                          | 2.762                                                                                          | 2.926                                                                                          |
| obs rflns                                                                                                | 10511                                                                                          | 10382                                                                                          | 10290                                                                                          | 10278                                                                                          | 10062                                                                                          | 10086                                                                                          |
| $\square\theta$<br>range (°)                                                                             | 2.42 / 25.01                                                                                   | 2.44 / 25.01                                                                                   | 2.44 / 25.01                                                                                   | 2.36 / 25.01                                                                                   | 2.38 / 25.01                                                                                   | 2.38 / 25.01                                                                                   |
| <i>F</i> (000)                                                                                           | 1376                                                                                           | 1392                                                                                           | 1396                                                                                           | 1400                                                                                           | 1404                                                                                           | 1408                                                                                           |
| GOF on <i>F</i> <sup>2</sup>                                                                             | 1.046                                                                                          | 1.047                                                                                          | 1.074                                                                                          | 1.062                                                                                          | 1.067                                                                                          | 1.102                                                                                          |
| <i>R</i> [int]                                                                                           | 0.0499                                                                                         | 0.0485                                                                                         | 0.0428                                                                                         | 0.0384                                                                                         | 0.0763                                                                                         | 0.0623                                                                                         |
| <i>R</i> <sub>1</sub> <sup>a</sup> / <i>wR</i> <sub>2</sub> <sup>b</sup><br>( <i>I</i> > 2σ( <i>I</i> )) | 0.0961,<br>0.2791                                                                              | 0.0935,<br>0.2523                                                                              | 0.1010,<br>0.2693                                                                              | 0.0839,<br>0.2314                                                                              | 0.1059,<br>0.2858                                                                              | 0.1203,<br>0.3001                                                                              |
| <i>R</i> <sub>1</sub> / <i>wR</i> <sub>2</sub><br>(all data)                                             | 0.1262,<br>0.3045                                                                              | 0.1213,<br>0.2766                                                                              | 0.1202,<br>0.2846                                                                              | 0.1043,<br>0.2525                                                                              | 0.1500, 0.3225                                                                                 | 0.1411,<br>0.3175                                                                              |

<sup>a</sup>*R*<sub>1</sub> =  $\sum ||F_o| - |F_c|| / \sum |F_o|$  and <sup>b</sup>*wR*<sub>2</sub> =  $\{\sum [w(F_o^2 - F_c^2)^2] / \sum [w(F_o^2)^2]\}^{1/2}$ .

**Table S2 Selected Bond Lengths (Å) for Compounds 1-6**

| Atom              | Atom | Length/Å  | Atom | Atom            | Length/Å  |
|-------------------|------|-----------|------|-----------------|-----------|
| <b>Compound 1</b> |      |           |      |                 |           |
| Pr1               | O1   | 2.523 (5) | Pr2  | O3              | 2.376 (4) |
| Pr1               | O2   | 2.397 (5) | Pr2  | O9 <sup>5</sup> | 2.469 (5) |
| Pr1               | O4   | 2.414 (4) | Pr2  | O11             | 2.519 (4) |

|                   |                  |           |     |                  |            |
|-------------------|------------------|-----------|-----|------------------|------------|
| Pr1               | O10 <sup>2</sup> | 2.352 (4) | Pr2 | O12              | 2.609 (5)  |
| Pr1               | O20 <sup>3</sup> | 2.383 (5) | Pr2 | O13              | 2.487 (4)  |
| Pr1               | O21 <sup>1</sup> | 2.492 (5) | Pr2 | O14              | 2.409 (5)  |
| Pr1               | O27 <sup>4</sup> | 2.458 (4) | Pr2 | O19 <sup>6</sup> | 2.472 (5)  |
|                   |                  |           | Pr2 | O26 <sup>4</sup> | 2.381 (4)  |
| <b>Compound 2</b> |                  |           |     |                  |            |
| Eu1               | O1               | 2.345 (5) | Eu2 | O2               | 2.354 (4)  |
| Eu1               | O7 <sup>2</sup>  | 2.332 (4) | Eu2 | O8 <sup>5</sup>  | 2.411 (5)  |
| Eu1               | O10 <sup>1</sup> | 2.432 (5) | Eu2 | O9               | 2.417 (5)  |
| Eu1               | O15 <sup>3</sup> | 2.393 (5) | Eu2 | O16 <sup>3</sup> | 2.329 (4)  |
| Eu1               | O17              | 2.354 (4) | Eu2 | O18              | 2.329 (4)  |
| Eu1               | O25 <sup>4</sup> | 2.286 (4) | Eu2 | O24 <sup>6</sup> | 2.395 (4)  |
| Eu1               | O28              | 2.485 (5) | Eu2 | O26              | 2.555 (5)  |
|                   |                  |           | Eu2 | O27              | 2.461 (5)  |
| <b>Compound 3</b> |                  |           |     |                  |            |
| Gd1               | O1               | 2.320 (6) | Gd2 | O2               | 2.378 (6)  |
| Gd1               | O7 <sup>1</sup>  | 2.390 (7) | Gd2 | O8 <sup>5</sup>  | 2.414 (7)  |
| Gd1               | O9               | 2.320 (7) | Gd2 | O10              | 2.340 (7)  |
| Gd1               | O16 <sup>2</sup> | 2.380 (7) | Gd2 | O15 <sup>6</sup> | 2.287 (6)  |
| Gd1               | O18 <sup>3</sup> | 2.388 (7) | Gd2 | O17              | 2.297 (7)  |
| Gd1               | O24 <sup>4</sup> | 2.346 (7) | Gd2 | O23 <sup>4</sup> | 2.339 (6)  |
| Gd1               | O26              | 2.455 (7) | Gd2 | O25              | 2.416 (10) |
| Gd1               | O27              | 2.526 (8) |     |                  |            |
| <b>Compound 4</b> |                  |           |     |                  |            |
| Tb1               | O2               | 2.339 (4) | Tb2 | O1               | 2.303 (4)  |
| Tb1               | O8 <sup>1</sup>  | 2.259 (4) | Tb2 | O7 <sup>4</sup>  | 2.365 (4)  |
| Tb1               | O10              | 2.318 (4) | Tb2 | O9               | 2.331 (4)  |
| Tb1               | O14 <sup>2</sup> | 2.364 (4) | Tb2 | O15 <sup>2</sup> | 2.297 (4)  |
| Tb1               | O17 <sup>3</sup> | 2.293 (4) | Tb2 | O16 <sup>5</sup> | 2.366 (4)  |
| Tb1               | O20              | 2.457 (5) | Tb2 | O21              | 2.429 (4)  |
| Tb1               | O22              | 2.401 (4) | Tb2 | O23              | 2.545 (5)  |
|                   |                  |           | Tb2 | O25 <sup>6</sup> | 2.366 (5)  |
| <b>Compound 5</b> |                  |           |     |                  |            |
| Dy1               | O1               | 2.381 (6) | Dy2 | O9 <sup>2</sup>  | 2.310 (7)  |
| Dy1               | O2               | 2.360 (6) | Dy2 | O10 <sup>3</sup> | 2.362 (6)  |
| Dy1               | O3 <sup>1</sup>  | 2.284 (6) | Dy2 | O11 <sup>2</sup> | 2.321 (6)  |
| Dy1               | O4               | 2.307 (6) | Dy2 | O12              | 2.425 (7)  |

|                   |                  |           |     |                  |            |
|-------------------|------------------|-----------|-----|------------------|------------|
| Dy1               | O5               | 2.358 (7) | Dy2 | O17              | 2.259 (6)  |
| Dy1               | O7               | 2.323 (6) | Dy2 | O18              | 2.411 (7)  |
| Dy1               | O8               | 2.520 (8) | Dy2 | O27              | 2.273 (7)  |
| Dy1               | O28              | 2.368 (6) |     |                  |            |
| <b>Compound 6</b> |                  |           |     |                  |            |
| Ho1               | O1               | 2.378 (8) | Ho2 | O2               | 2.351 (8)  |
| Ho1               | O3               | 2.399 (9) | Ho2 | O8 <sup>5</sup>  | 2.289 (8)  |
| Ho1               | O9 <sup>1</sup>  | 2.340 (8) | Ho2 | O11              | 2.335 (8)  |
| Ho1               | O10              | 2.296 (8) | Ho2 | O12              | 2.367 (9)  |
| Ho1               | O19 <sup>2</sup> | 2.306 (9) | Ho2 | O13              | 2.566 (12) |
| Ho1               | O21 <sup>3</sup> | 2.311 (7) | Ho2 | O14              | 2.284 (7)  |
| Ho1               | O27 <sup>4</sup> | 2.247 (8) | Ho2 | O20 <sup>6</sup> | 2.289 (8)  |
|                   |                  |           | Ho2 | O26 <sup>4</sup> | 2.334 (7)  |

**Table S3** Selected Bond Angles (deg) for Compounds 1-6

| Atom              | Atom | Atom             | Angle/°     | Atom            | Atom | Atom             | Angle/°     |
|-------------------|------|------------------|-------------|-----------------|------|------------------|-------------|
| <b>Compound 1</b> |      |                  |             |                 |      |                  |             |
| O1                | Pr1  | O13 <sup>1</sup> | 74.41 (15)  | O3              | Pr2  | O9 <sup>5</sup>  | 74.42 (15)  |
| O2                | Pr1  | O1               | 67.73 (17)  | O3              | Pr2  | O11              | 142.03 (17) |
| O2                | Pr1  | O4               | 82.10 (16)  | O3              | Pr2  | O12              | 131.57 (16) |
| O2                | Pr1  | O13 <sup>1</sup> | 136.95 (14) | O3              | Pr2  | O13              | 78.02 (14)  |
| O2                | Pr1  | O21 <sup>1</sup> | 128.91 (17) | O3              | Pr2  | O14              | 76.40 (16)  |
| O2                | Pr1  | O27 <sup>2</sup> | 75.68 (15)  | O3              | Pr2  | O19 <sup>6</sup> | 137.23 (18) |
| O4                | Pr1  | O1               | 91.39 (19)  | O3              | Pr2  | O26 <sup>2</sup> | 78.14 (15)  |
| O4                | Pr1  | O13 <sup>1</sup> | 119.26 (15) | O9 <sup>5</sup> | Pr2  | O11              | 71.28 (16)  |
| O4                | Pr1  | O21 <sup>1</sup> | 71.16 (15)  | O9 <sup>5</sup> | Pr2  | O12              | 135.56 (16) |
| O4                | Pr1  | O27 <sup>2</sup> | 97.50 (15)  | O9 <sup>5</sup> | Pr2  | O13              | 78.20 (16)  |
| O10 <sup>3</sup>  | Pr1  | O1               | 86.43 (18)  | O9 <sup>5</sup> | Pr2  | O19 <sup>6</sup> | 123.74 (16) |
| O10 <sup>3</sup>  | Pr1  | O2               | 88.92 (16)  | O11             | Pr2  | O12              | 69.48 (17)  |
| O10 <sup>3</sup>  | Pr1  | O4               | 170.91 (16) | O13             | Pr2  | O11              | 109.80 (16) |
| O10 <sup>3</sup>  | Pr1  | O13 <sup>1</sup> | 68.61 (14)  | O13             | Pr2  | O12              | 134.99 (15) |
| O10 <sup>3</sup>  | Pr1  | O20 <sup>4</sup> | 99.00 (16)  | O14             | Pr2  | O9 <sup>5</sup>  | 150.76 (15) |
| O10 <sup>3</sup>  | Pr1  | O21 <sup>1</sup> | 116.14 (15) | O14             | Pr2  | O11              | 137.02 (16) |
| O10 <sup>3</sup>  | Pr1  | O27 <sup>2</sup> | 78.85 (15)  | O14             | Pr2  | O12              | 68.45 (16)  |
| O20 <sup>4</sup>  | Pr1  | O1               | 144.01 (18) | O14             | Pr2  | O13              | 93.93 (16)  |
| O20 <sup>4</sup>  | Pr1  | O2               | 147.24 (16) | O14             | Pr2  | O19 <sup>6</sup> | 78.00 (17)  |

|                  |     |                  |             |                  |     |                  |             |
|------------------|-----|------------------|-------------|------------------|-----|------------------|-------------|
| O20 <sup>4</sup> | Pr1 | O4               | 87.95 (17)  | O19 <sup>6</sup> | Pr2 | O11              | 77.31 (18)  |
| O20 <sup>4</sup> | Pr1 | O13 <sup>1</sup> | 74.67 (14)  | O19 <sup>6</sup> | Pr2 | O12              | 65.82 (17)  |
| O20 <sup>4</sup> | Pr1 | O21 <sup>1</sup> | 75.57 (17)  | O19 <sup>6</sup> | Pr2 | O13              | 70.19 (16)  |
| O20 <sup>4</sup> | Pr1 | O27 <sup>2</sup> | 74.80 (16)  | O26 <sup>2</sup> | Pr2 | O9 <sup>5</sup>  | 82.44 (16)  |
| O21 <sup>1</sup> | Pr1 | O1               | 70.24 (18)  | O26 <sup>2</sup> | Pr2 | O11              | 81.66 (16)  |
| O21 <sup>1</sup> | Pr1 | O13 <sup>1</sup> | 48.28 (13)  | O26 <sup>2</sup> | Pr2 | O12              | 72.08 (16)  |
| O27 <sup>2</sup> | Pr1 | O1               | 140.70 (17) | O26 <sup>2</sup> | Pr2 | O13              | 152.54 (15) |
| O27 <sup>2</sup> | Pr1 | O13 <sup>1</sup> | 130.48 (14) | O26 <sup>2</sup> | Pr2 | O14              | 93.53 (16)  |
| O27 <sup>2</sup> | Pr1 | O21 <sup>1</sup> | 148.58 (16) | O26 <sup>2</sup> | Pr2 | O19 <sup>6</sup> | 137.26 (17) |

**Compound 2**

|                  |     |                  |             |                  |     |                  |             |
|------------------|-----|------------------|-------------|------------------|-----|------------------|-------------|
| O1               | Eu1 | O9 <sup>1</sup>  | 120.33 (14) | O2               | Eu2 | O8 <sup>5</sup>  | 79.63 (16)  |
| O1               | Eu1 | O10 <sup>1</sup> | 72.56 (16)  | O2               | Eu2 | O9               | 92.14 (16)  |
| O1               | Eu1 | O15 <sup>2</sup> | 96.84 (16)  | O2               | Eu2 | O24 <sup>6</sup> | 151.43 (16) |
| O1               | Eu1 | O17              | 82.54 (15)  | O2               | Eu2 | O26              | 69.10 (17)  |
| O1               | Eu1 | O28              | 92.3 (2)    | O2               | Eu2 | O27              | 136.61 (16) |
| O7 <sup>3</sup>  | Eu1 | O1               | 88.08 (17)  | O8 <sup>5</sup>  | Eu2 | O9               | 71.80 (16)  |
| O7 <sup>3</sup>  | Eu1 | O9 <sup>1</sup>  | 74.64 (14)  | O8 <sup>5</sup>  | Eu2 | O26              | 66.13 (17)  |
| O7 <sup>3</sup>  | Eu1 | O10 <sup>1</sup> | 76.24 (16)  | O8 <sup>5</sup>  | Eu2 | O27              | 76.10 (19)  |
| O7 <sup>3</sup>  | Eu1 | O15 <sup>2</sup> | 73.88 (15)  | O9               | Eu2 | O26              | 136.16 (17) |
| O7 <sup>3</sup>  | Eu1 | O17              | 146.69 (17) | O9               | Eu2 | O27              | 113.15 (16) |
| O7 <sup>3</sup>  | Eu1 | O28              | 143.72 (17) | O16 <sup>2</sup> | Eu2 | O2               | 94.76 (16)  |
| O10 <sup>1</sup> | Eu1 | O9 <sup>1</sup>  | 48.03 (14)  | O16 <sup>2</sup> | Eu2 | O8 <sup>5</sup>  | 135.75 (17) |
| O10 <sup>1</sup> | Eu1 | O28              | 69.35 (19)  | O16 <sup>2</sup> | Eu2 | O9               | 152.41 (16) |
| O15 <sup>2</sup> | Eu1 | O9 <sup>1</sup>  | 129.58 (14) | O16 <sup>2</sup> | Eu2 | O18              | 78.28 (17)  |
| O15 <sup>2</sup> | Eu1 | O10 <sup>1</sup> | 148.59 (15) | O16 <sup>2</sup> | Eu2 | O24 <sup>6</sup> | 83.62 (15)  |
| O15 <sup>2</sup> | Eu1 | O28              | 141.76 (17) | O16 <sup>2</sup> | Eu2 | O26              | 70.87 (18)  |
| O17              | Eu1 | O9 <sup>1</sup>  | 137.02 (14) | O16 <sup>2</sup> | Eu2 | O27              | 78.99 (18)  |
| O17              | Eu1 | O10 <sup>1</sup> | 129.80 (17) | O18              | Eu2 | O2               | 76.89 (16)  |
| O17              | Eu1 | O15 <sup>2</sup> | 75.61 (16)  | O18              | Eu2 | O8 <sup>5</sup>  | 140.13 (19) |
| O17              | Eu1 | O28              | 68.86 (17)  | O18              | Eu2 | O9               | 77.35 (16)  |
| O25 <sup>4</sup> | Eu1 | O1               | 170.47 (14) | O18              | Eu2 | O24 <sup>6</sup> | 74.85 (16)  |
| O25 <sup>4</sup> | Eu1 | O7 <sup>3</sup>  | 99.23 (16)  | O18              | Eu2 | O26              | 131.07 (16) |
| O25 <sup>4</sup> | Eu1 | O9 <sup>1</sup>  | 67.93 (14)  | O18              | Eu2 | O27              | 140.80 (18) |
| O25 <sup>4</sup> | Eu1 | O10 <sup>1</sup> | 114.99 (16) | O24 <sup>6</sup> | Eu2 | O8 <sup>5</sup>  | 120.84 (15) |
| O25 <sup>4</sup> | Eu1 | O15 <sup>2</sup> | 79.50 (16)  | O24 <sup>6</sup> | Eu2 | O9               | 77.71 (15)  |
| O25 <sup>4</sup> | Eu1 | O17              | 88.01 (15)  | O24 <sup>6</sup> | Eu2 | O26              | 135.30 (17) |
| O25 <sup>4</sup> | Eu1 | O28              | 85.5 (2)    | O24 <sup>6</sup> | Eu2 | O27              | 71.23 (16)  |

|                   |     |                  |             |                  |     |                  |             |
|-------------------|-----|------------------|-------------|------------------|-----|------------------|-------------|
| O28               | Eu1 | O9 <sup>1</sup>  | 74.01 (15)  | O27              | Eu2 | O26              | 68.32 (17)  |
| <b>Compound 3</b> |     |                  |             |                  |     |                  |             |
| O1                | Gd1 | O7 <sup>1</sup>  | 152.5 (3)   | O2               | Gd2 | O7 <sup>5</sup>  | 129.7 (2)   |
| O1                | Gd1 | O16 <sup>2</sup> | 84.3 (2)    | O2               | Gd2 | O8 <sup>5</sup>  | 149.2 (3)   |
| O1                | Gd1 | O18 <sup>3</sup> | 135.7 (3)   | O2               | Gd2 | O25              | 140.3 (3)   |
| O1                | Gd1 | O24 <sup>4</sup> | 94.2 (3)    | O8 <sup>5</sup>  | Gd2 | O7 <sup>5</sup>  | 47.2 (2)    |
| O1                | Gd1 | O26              | 79.6 (3)    | O8 <sup>5</sup>  | Gd2 | O25              | 70.3 (3)    |
| O1                | Gd1 | O27              | 70.6 (3)    | O10              | Gd2 | O2               | 75.3 (2)    |
| O7 <sup>1</sup>   | Gd1 | O26              | 113.1 (3)   | O10              | Gd2 | O7 <sup>5</sup>  | 136.5 (2)   |
| O7 <sup>1</sup>   | Gd1 | O27              | 136.1 (3)   | O10              | Gd2 | O8 <sup>5</sup>  | 130.4 (3)   |
| O9                | Gd1 | O1               | 78.7 (3)    | O10              | Gd2 | O25              | 67.7 (3)    |
| O9                | Gd1 | O7 <sup>1</sup>  | 76.7 (3)    | O15 <sup>6</sup> | Gd2 | O2               | 80.0 (2)    |
| O9                | Gd1 | O16 <sup>2</sup> | 75.4 (3)    | O15 <sup>6</sup> | Gd2 | O7 <sup>5</sup>  | 67.2 (2)    |
| O9                | Gd1 | O18 <sup>3</sup> | 139.7 (3)   | O15 <sup>6</sup> | Gd2 | O8 <sup>5</sup>  | 113.4 (2)   |
| O9                | Gd1 | O24 <sup>4</sup> | 76.7 (2)    | O15 <sup>6</sup> | Gd2 | O10              | 87.7 (3)    |
| O9                | Gd1 | O26              | 141.3 (3)   | O15 <sup>6</sup> | Gd2 | O17              | 98.7 (3)    |
| O9                | Gd1 | O27              | 131.2 (3)   | O15 <sup>6</sup> | Gd2 | O23 <sup>4</sup> | 170.9 (2)   |
| O16 <sup>2</sup>  | Gd1 | O7 <sup>1</sup>  | 77.8 (2)    | O15 <sup>6</sup> | Gd2 | O25              | 84.6 (3)    |
| O16 <sup>2</sup>  | Gd1 | O18 <sup>3</sup> | 120.3 (3)   | O17              | Gd2 | O2               | 74.3 (2)    |
| O16 <sup>2</sup>  | Gd1 | O26              | 70.9 (3)    | O17              | Gd2 | O7 <sup>5</sup>  | 74.3 (2)    |
| O16 <sup>2</sup>  | Gd1 | O27              | 135.3 (3)   | O17              | Gd2 | O8 <sup>5</sup>  | 76.3 (3)    |
| O18 <sup>3</sup>  | Gd1 | O7 <sup>1</sup>  | 71.8 (3)    | O17              | Gd2 | O10              | 147.2 (3)   |
| O18 <sup>3</sup>  | Gd1 | O26              | 75.8 (3)    | O17              | Gd2 | O23 <sup>4</sup> | 88.3 (3)    |
| O18 <sup>3</sup>  | Gd1 | O27              | 66.2 (3)    | O17              | Gd2 | O25              | 144.7 (3)   |
| O24 <sup>4</sup>  | Gd1 | O7 <sup>1</sup>  | 91.8 (2)    | O23 <sup>4</sup> | Gd2 | O2               | 96.6 (2)    |
| O24 <sup>4</sup>  | Gd1 | O16 <sup>2</sup> | 151.7 (3)   | O23 <sup>4</sup> | Gd2 | O7 <sup>5</sup>  | 120.6 (2)   |
| O24 <sup>4</sup>  | Gd1 | O18 <sup>3</sup> | 79.8 (3)    | O23 <sup>4</sup> | Gd2 | O8 <sup>5</sup>  | 73.7 (2)    |
| O24 <sup>4</sup>  | Gd1 | O26              | 136.7 (3)   | O23 <sup>4</sup> | Gd2 | O10              | 83.3 (3)    |
| O24 <sup>4</sup>  | Gd1 | O27              | 69.0 (3)    | O23 <sup>4</sup> | Gd2 | O25              | 93.1 (3)    |
| O26               | Gd1 | O27              | 68.6 (3)    | O25              | Gd2 | O7 <sup>5</sup>  | 74.7 (3)    |
| <b>Compound 4</b> |     |                  |             |                  |     |                  |             |
| O2                | Tb1 | O14 <sup>1</sup> | 75.82 (15)  | O1               | Tb2 | O23              | 130.94 (16) |
| O2                | Tb1 | O20              | 68.30 (16)  | O1               | Tb2 | O25 <sup>6</sup> | 77.38 (16)  |
| O2                | Tb1 | O22              | 130.26 (16) | O7 <sup>4</sup>  | Tb2 | O16 <sup>5</sup> | 120.50 (13) |
| O8 <sup>2</sup>   | Tb1 | O2               | 87.79 (14)  | O7 <sup>4</sup>  | Tb2 | O21              | 71.64 (16)  |
| O8 <sup>2</sup>   | Tb1 | O10              | 171.28 (13) | O7 <sup>4</sup>  | Tb2 | O23              | 134.80 (16) |
| O8 <sup>2</sup>   | Tb1 | O14 <sup>1</sup> | 80.49 (14)  | O7 <sup>4</sup>  | Tb2 | O25 <sup>6</sup> | 77.63 (14)  |



|                  |     |                  |             |                  |     |                  |             |
|------------------|-----|------------------|-------------|------------------|-----|------------------|-------------|
| O8 <sup>2</sup>  | Tb1 | O17 <sup>3</sup> | 97.59 (15)  | O9               | Tb2 | O7 <sup>4</sup>  | 152.38 (14) |
| O8 <sup>2</sup>  | Tb1 | O20              | 85.40 (19)  | O9               | Tb2 | O16 <sup>5</sup> | 79.40 (14)  |
| O8 <sup>2</sup>  | Tb1 | O22              | 112.89 (13) | O9               | Tb2 | O21              | 135.03 (16) |
| O10              | Tb1 | O2               | 83.55 (14)  | O9               | Tb2 | O23              | 68.72 (16)  |
| O10              | Tb1 | O14 <sup>1</sup> | 96.33 (14)  | O9               | Tb2 | O25 <sup>6</sup> | 92.61 (15)  |
| O10              | Tb1 | O20              | 92.32 (19)  | O15 <sup>1</sup> | Tb2 | O1               | 78.33 (16)  |
| O10              | Tb1 | O22              | 73.90 (13)  | O15 <sup>1</sup> | Tb2 | O7 <sup>4</sup>  | 84.96 (14)  |
| O14 <sup>1</sup> | Tb1 | O20              | 141.82 (15) | O15 <sup>1</sup> | Tb2 | O9               | 93.45 (14)  |
| O14 <sup>1</sup> | Tb1 | O22              | 148.96 (14) | O15 <sup>1</sup> | Tb2 | O16 <sup>5</sup> | 134.96 (16) |
| O17 <sup>3</sup> | Tb1 | O2               | 147.89 (14) | O15 <sup>1</sup> | Tb2 | O21              | 77.98 (16)  |
| O17 <sup>3</sup> | Tb1 | O10              | 89.25 (15)  | O15 <sup>1</sup> | Tb2 | O23              | 69.81 (17)  |
| O17 <sup>3</sup> | Tb1 | O14 <sup>1</sup> | 73.95 (14)  | O15 <sup>1</sup> | Tb2 | O25 <sup>6</sup> | 152.98 (15) |
| O17 <sup>3</sup> | Tb1 | O20              | 143.47 (15) | O16 <sup>5</sup> | Tb2 | O21              | 76.68 (16)  |
| O17 <sup>3</sup> | Tb1 | O22              | 76.49 (15)  | O16 <sup>5</sup> | Tb2 | O23              | 66.17 (17)  |
| O22              | Tb1 | O20              | 68.99 (17)  | O16 <sup>5</sup> | Tb2 | O25 <sup>6</sup> | 72.05 (15)  |
| O1               | Tb2 | O7 <sup>4</sup>  | 75.40 (14)  | O21              | Tb2 | O23              | 66.89 (17)  |
| O1               | Tb2 | O9               | 77.28 (13)  | O25 <sup>6</sup> | Tb2 | O21              | 114.89 (16) |
| O1               | Tb2 | O16 <sup>5</sup> | 140.29 (17) | O25 <sup>6</sup> | Tb2 | O23              | 136.48 (16) |
| O1               | Tb2 | O21              | 140.67 (15) |                  |     |                  |             |

**Compound 5**

|                 |     |     |           |                  |     |                  |           |
|-----------------|-----|-----|-----------|------------------|-----|------------------|-----------|
| O1              | Dy1 | O8  | 67.8 (3)  | O9 <sup>2</sup>  | Dy2 | O5               | 120.6 (2) |
| O2              | Dy1 | O1  | 72.1 (2)  | O9 <sup>2</sup>  | Dy2 | O10 <sup>3</sup> | 97.0 (2)  |
| O2              | Dy1 | O8  | 135.7 (3) | O9 <sup>2</sup>  | Dy2 | O11 <sup>2</sup> | 83.4 (2)  |
| O2              | Dy1 | O28 | 120.9 (2) | O9 <sup>2</sup>  | Dy2 | O12              | 93.7 (3)  |
| O3 <sup>1</sup> | Dy1 | O1  | 78.6 (2)  | O9 <sup>2</sup>  | Dy2 | O18              | 72.9 (2)  |
| O3 <sup>1</sup> | Dy1 | O2  | 83.5 (2)  | O10 <sup>3</sup> | Dy2 | O5               | 129.0 (2) |
| O3 <sup>1</sup> | Dy1 | O4  | 78.0 (2)  | O10 <sup>3</sup> | Dy2 | O12              | 141.3 (3) |
| O3 <sup>1</sup> | Dy1 | O5  | 152.2 (2) | O10 <sup>3</sup> | Dy2 | O18              | 148.6 (2) |
| O3 <sup>1</sup> | Dy1 | O7  | 94.6 (2)  | O11 <sup>2</sup> | Dy2 | O5               | 136.9 (2) |
| O3 <sup>1</sup> | Dy1 | O8  | 71.2 (3)  | O11 <sup>2</sup> | Dy2 | O10 <sup>3</sup> | 75.4 (2)  |
| O3 <sup>1</sup> | Dy1 | O28 | 135.6 (2) | O11 <sup>2</sup> | Dy2 | O12              | 69.1 (2)  |
| O4              | Dy1 | O1  | 141.4 (2) | O11 <sup>2</sup> | Dy2 | O18              | 130.6 (2) |
| O4              | Dy1 | O2  | 75.1 (2)  | O12              | Dy2 | O5               | 73.8 (2)  |
| O4              | Dy1 | O5  | 77.5 (2)  | O17              | Dy2 | O5               | 67.5 (2)  |
| O4              | Dy1 | O7  | 77.1 (2)  | O17              | Dy2 | O9 <sup>2</sup>  | 170.6 (2) |
| O4              | Dy1 | O8  | 130.5 (2) | O17              | Dy2 | O10 <sup>3</sup> | 79.6 (2)  |
| O4              | Dy1 | O28 | 140.5 (3) | O17              | Dy2 | O11 <sup>2</sup> | 87.2 (2)  |

|                   |     |                  |           |                  |     |                  |           |
|-------------------|-----|------------------|-----------|------------------|-----|------------------|-----------|
| O5                | Dy1 | O1               | 114.0 (2) | O17              | Dy2 | O12              | 83.8 (3)  |
| O5                | Dy1 | O2               | 77.7 (2)  | O17              | Dy2 | O18              | 114.4 (2) |
| O5                | Dy1 | O8               | 135.9 (3) | O17              | Dy2 | O27              | 99.9 (2)  |
| O5                | Dy1 | O28              | 72.2 (2)  | O18              | Dy2 | O5               | 48.0 (2)  |
| O7                | Dy1 | O1               | 135.2 (2) | O18              | Dy2 | O12              | 70.0 (3)  |
| O7                | Dy1 | O2               | 151.9 (2) | O27              | Dy2 | O5               | 74.9 (2)  |
| O7                | Dy1 | O5               | 92.5 (2)  | O27              | Dy2 | O9 <sup>2</sup>  | 87.5 (2)  |
| O7                | Dy1 | O8               | 68.1 (2)  | O27              | Dy2 | O10 <sup>3</sup> | 73.6 (2)  |
| O7                | Dy1 | O28              | 79.5 (2)  | O27              | Dy2 | O11 <sup>2</sup> | 146.2 (2) |
| O28               | Dy1 | O1               | 75.7 (2)  | O27              | Dy2 | O12              | 144.2 (2) |
| O28               | Dy1 | O8               | 65.7 (3)  | O27              | Dy2 | O18              | 76.3 (2)  |
| <b>Compound 6</b> |     |                  |           |                  |     |                  |           |
| O1                | Ho1 | O3               | 70.3 (3)  | O8 <sup>5</sup>  | Ho2 | O12              | 78.2 (3)  |
| O9 <sup>1</sup>   | Ho1 | O1               | 148.5 (3) | O8 <sup>5</sup>  | Ho2 | O13              | 69.0 (4)  |
| O9 <sup>1</sup>   | Ho1 | O3               | 140.9 (3) | O8 <sup>5</sup>  | Ho2 | O26 <sup>4</sup> | 84.1 (3)  |
| O10               | Ho1 | O1               | 76.7 (3)  | O11              | Ho2 | O2               | 72.6 (3)  |
| O10               | Ho1 | O3               | 144.4 (3) | O11              | Ho2 | O12              | 75.4 (3)  |
| O10               | Ho1 | O9 <sup>1</sup>  | 73.7 (3)  | O11              | Ho2 | O13              | 66.5 (4)  |
| O10               | Ho1 | O19 <sup>2</sup> | 88.6 (3)  | O12              | Ho2 | O13              | 66.1 (4)  |
| O10               | Ho1 | O21 <sup>3</sup> | 147.2 (3) | O14              | Ho2 | O2               | 77.6 (3)  |
| O19 <sup>2</sup>  | Ho1 | O1               | 72.6 (3)  | O14              | Ho2 | O8 <sup>5</sup>  | 78.6 (3)  |
| O19 <sup>2</sup>  | Ho1 | O3               | 94.0 (3)  | O14              | Ho2 | O11              | 139.9 (3) |
| O19 <sup>2</sup>  | Ho1 | O9 <sup>1</sup>  | 95.9 (3)  | O14              | Ho2 | O12              | 143.0 (3) |
| O19 <sup>2</sup>  | Ho1 | O21 <sup>3</sup> | 83.4 (3)  | O14              | Ho2 | O13              | 129.3 (4) |
| O21 <sup>3</sup>  | Ho1 | O1               | 129.8 (3) | O14              | Ho2 | O20 <sup>6</sup> | 77.8 (3)  |
| O21 <sup>3</sup>  | Ho1 | O3               | 68.1 (3)  | O14              | Ho2 | O26 <sup>4</sup> | 75.5 (3)  |
| O21 <sup>3</sup>  | Ho1 | O9 <sup>1</sup>  | 75.6 (3)  | O20 <sup>6</sup> | Ho2 | O2               | 94.9 (3)  |
| O27 <sup>4</sup>  | Ho1 | O1               | 114.9 (3) | O20 <sup>6</sup> | Ho2 | O8 <sup>5</sup>  | 92.5 (3)  |
| O27 <sup>4</sup>  | Ho1 | O3               | 84.1 (3)  | O20 <sup>6</sup> | Ho2 | O11              | 78.5 (3)  |
| O27 <sup>4</sup>  | Ho1 | O9 <sup>1</sup>  | 80.2 (3)  | O20 <sup>6</sup> | Ho2 | O12              | 131.5 (3) |
| O27 <sup>4</sup>  | Ho1 | O10              | 98.2 (3)  | O20 <sup>6</sup> | Ho2 | O13              | 66.2 (4)  |
| O27 <sup>4</sup>  | Ho1 | O19 <sup>2</sup> | 170.8 (3) | O20 <sup>6</sup> | Ho2 | O26 <sup>4</sup> | 153.2 (3) |
| O27 <sup>4</sup>  | Ho1 | O21 <sup>3</sup> | 87.5 (3)  | O26 <sup>4</sup> | Ho2 | O2               | 77.7 (3)  |
| O2                | Ho2 | O12              | 114.8 (3) | O26 <sup>4</sup> | Ho2 | O11              | 122.1 (3) |
| O2                | Ho2 | O13              | 137.3 (4) | O26 <sup>4</sup> | Ho2 | O12              | 73.8 (3)  |
| O8 <sup>5</sup>   | Ho2 | O2               | 153.0 (3) | O26 <sup>4</sup> | Ho2 | O13              | 135.1 (4) |
| O8 <sup>5</sup>   | Ho2 | O11              | 134.4 (3) |                  |     |                  |           |
